# Supplementary material for: Understanding intimate self-care among riverine women: qualitative research through the lens of the Sunrise Model
Source: PubMed Central journal article supplement (PMC11259441; doi:10.1590/0034-7167-2023-0364), 2024-07-19
Supplement: 0034-7167-reben-77-02-e20230364-Suppl01.pdf [file 0034-7167-reben-77-02-e20230364-Suppl01.pdf]

## TRANSCRIÇÃO DE ENTREVISTA

### PRIMEIRA ENTREVISTA - GRAVAÇÃO: **P1**

1. **Idade:** 43 anos
2. **Estado Civil:** casada
3. **Filhos:** sim
- 3.1 **Se sim quantos:** 2
4. **Escolaridade:** ens. Médio completo
5. **Profissão:** doméstica
6. **Qual sua renda mensal (quantos salários-mínimos):** 2 s. mínimo
7. **Quantas pessoas moram na sua casa:** 4

### ENTREVISTA

#### **O que você compreende quando escuta a expressão “cuidados íntimos”?**

“Cuidados íntimos são... acho que os cuidados com nossas partes íntimas né, fazer o tratamento direito, a lavagem... acho que isso” – P1

#### **Quem lhe ensinou a ter esse tipo de cuidado?**

“Minha mãe me ensinou... e decorrência de ir ao médico né, o ginecologista... ah explicar essa situação de cuidados íntimos” – P1

#### **A senhora lembra idade que começou pensar em cuidados íntimos?**

“Não... hum não lembro” – P1

#### **Quais são as coisas que você faz no dia a dia que fazem parte do seu cuidado íntimo?**

“Olha o banho né com asseio e uso aqueles sabonetes íntimos” – P1

#### **Já buscou ajuda profissional para ter mais informações sobre isso? Quais profissionais?**

“o ginecologista” – P1

#### **O que facilita ou dificulta a execução destes cuidados íntimos na sua opinião?**

“O que facilita... acho que... o que facilita assim é a questão da gente ter consciência de que precisa ter esses cuidados, que nem quando a gente a gente já teve cuidados com certos incômodos, a gente ter as informações corretas” – P1

#### **O que é inadequado na realização dos cuidados íntimos?**

“Inadequado (pausa) o que eu acho inadequado, que eu não gosto muito assim... é de conversar sobre essas coisas principalmente da parte íntima com homem médico...eu não gosto (riso)” – P1

## SEGUNDA ENTREVISTA - GRAVAÇÃO: P1

### **Quais são as coisas que você faz no dia a dia que fazem parte do seu cuidado íntimo?**

“Eu tomo banho.... ai eu tomo banho, ai me asseio, faço aquela ervas né medicinais pra fazer aqueles banhos pra fazer aqueles asseios...” – P1

### **O que facilita ou dificulta a execução destes cuidados íntimos na sua opinião?**

“O que facilita tipo assim... é que as ervas a gente tem, é fácil da gente conseguir... acho que a dificuldade a gente não tem nenhuma” – P1

### **O que é inadequado na realização dos cuidados íntimos?**

“Ah.. por exemplo o que vocês falaram do sabonete intimo né... que é comum a gente ver sabonete intimo e pensa que a gente pode ta utilizando direto né, e acaba não, que já tinha ouvido falar do ph, mas eu pensei que era o sabonete em barra que... alterava, agora não, eu fiquei sabendo que o intimo também altera... é sempre bom a gente ta sabendo mais, por exemplo eu não imaginaria isso do sabonete íntimo” – P1
