# Supplementary material for: Understanding intimate self-care among riverine women: qualitative research through the lens of the Sunrise Model
Source: PubMed Central journal article supplement (PMC11259441; doi:10.1590/0034-7167-2023-0364), 2024-07-19
Supplement: 0034-7167-reben-77-02-e20230364-Suppl02.pdf [file 0034-7167-reben-77-02-e20230364-Suppl02.pdf]

## TRANSCRIÇÃO DE ENTREVISTA

ENTREVISTA – PÓS DINÂMICA. GRAVAÇÃO: **P2**

- 1. Idade:** 34 anos
- 2. Estado Civil:** casada
- 3. Filhos:** sim
- 3.1 Se sim quantos:** 01
- 4. Escolaridade:** Fundamental Completo
- 5. Profissão:** Pescadora
- 6. Qual sua renda mensal (quantos salários-mínimos):** 01 salário mínimo
- 7. Quantas pessoas moram na sua casa:** 02 pessoas

### ENTREVISTA

**O que você compreende quando escuta a expressão “cuidados íntimos”?**

“lavar as partes íntimas” – P2

**Quem lhe ensinou a ter esse tipo de cuidado?**

“indo ao médico” – P2

**A senhora lembra idade que começou pensar em cuidados íntimos?**

“desde criança” – P2

**Quais são as coisas que você faz no dia a dia que fazem parte do seu cuidado íntimo?**

“asseio, depilação, banho” – P2

**Já buscou ajuda profissional para ter mais informações sobre isso? Quais profissionais?**

“sim, do ginecologista” – P2

**O que facilita ou dificulta a execução destes cuidados íntimos na sua opinião?**

“facilita: palestras, informações. Dificulta: falta de acesso” – P2

**O que é inadequado na realização dos cuidados íntimos?**

“falta de algum conselho de como fazer direito” – P2

ENTREVISTA – PÓS DINÂMICA. GRAVAÇÃO: **P2**

**Quais são as coisas que você faz no dia a dia que fazem parte do seu cuidado íntimo?**

“troca de absorvente, limpeza após a relação, alimentação...– P2

**O que facilita ou dificulta a execução destes cuidados íntimos na sua opinião?**

“falta de informação” – P2

**O que é inadequado na realização dos cuidados íntimos?**

“não sei” – P2
