# Supplementary material for: Understanding intimate self-care among riverine women: qualitative research through the lens of the Sunrise Model
Source: PubMed Central journal article supplement (PMC11259441; doi:10.1590/0034-7167-2023-0364), 2024-07-19
Supplement: 0034-7167-reben-77-02-e20230364-Suppl04.pdf [file 0034-7167-reben-77-02-e20230364-Suppl04.pdf]

## TRANSCRIÇÃO DE ENTREVISTA

ENTREVISTA – PÓS DINÂMICA. GRAVAÇÃO: **P4**

- 1. Idade:** 43 anos
- 2. Estado Civil:** solteira
- 3. Filhos:** sim
- 3.1 Se sim quantos:** 02
- 4. Escolaridade:** Ensino Médio Incompleto
- 5. Profissão:** Pescadora
- 6. Qual sua renda mensal (quantos salários-mínimos):** menos de salário mínimo
- 7. Quantas pessoas moram na sua casa:** 01 pessoa

### ENTREVISTA

**O que você compreende quando escuta a expressão “cuidados íntimos”?**

“eu compreendo que eu tenho que fazer uma boa higiene né, a lavagem, tenho que ir ao médico, me consultar, fazer depilação...” – P4

**Quem lhe ensinou a ter esse tipo de cuidado?**

“minha mãe” – P4

**A senhora lembra idade que começou pensar em cuidados íntimos?**

“quando eu comecei a menstruar (13 anos de idade)” – P4

**Quais são as coisas que você faz no dia a dia que fazem parte do seu cuidado íntimo?**

“tipo de manhã quando eu levanto eu faço a minha higiene: passo um sabonete íntimo e depois troco de roupa, amis tarde tomo um banho e torno a lavar, tomando vários banhos, mas não uso sabonete íntimo em todos os banhos... também troco o meu absorvente de duas em duas horas quando estou menstruada.” – P4

**Já buscou ajuda profissional para ter mais informações sobre isso? Quais profissionais?**

“não” – P4

**O que facilita ou dificulta a execução destes cuidados íntimos na sua opinião?**

“dificulta: a água, que não é uma água limpa” – P4

**O que é inadequado na realização dos cuidados íntimos?**

“acho que a questão da água” – P4

ENTREVISTA – PÓS DINÂMICA. GRAVAÇÃO: **P4**

**Quais são as coisas que você faz no dia a dia que fazem parte do seu cuidado íntimo?**

“lavava muito com sabão íntimo, lavar também com água a as partes íntimas, a depilação...”. – P4

**O que facilita ou dificulta a execução destes cuidados íntimos na sua opinião?**

“estar sozinha em casa facilita, mas dificulta a questão de a água não ser ideal” – P4

**O que é inadequado na realização dos cuidados íntimos?**

“o excesso do sabonete íntimo e a água” – P4
