# Supplementary material for: Understanding intimate self-care among riverine women: qualitative research through the lens of the Sunrise Model
Source: PubMed Central journal article supplement (PMC11259441; doi:10.1590/0034-7167-2023-0364), 2024-07-19
Supplement: 0034-7167-reben-77-02-e20230364-Suppl05.pdf [file 0034-7167-reben-77-02-e20230364-Suppl05.pdf]

## TRANSCRIÇÃO DE ENTREVISTA

PRIMEIRA ENTREVISTA - GRAVAÇÃO: **P5**

1. **Idade:** 54 anos
2. **Estado Civil:** casada
3. **Filhos:** sim
- 3.1 **Se sim quantos:** 3
4. **Escolaridade:** ens. Fundamental inc.
5. **Profissão:** pescaria
6. **Qual sua renda mensal (quantos salários-mínimos):** 1 s. mínimo
7. **Quantas pessoas moram na sua casa:** 4

### ENTREVISTA

**O que você compreende quando escuta a expressão “cuidados íntimos”?**

“Cuidados íntimos é higiene né... cuidar do corpo... ir ao médico” – P5

**Quem lhe ensinou a ter esse tipo de cuidado?**

“Minha mãe né...” – P5

**E a senhora lembra idade que ela começou a falar sobre?**

“é ela começou me ensinar com uns 7 anos... sobre essas coisinhas” – P5

**Hum então a senhora já menstruava com 7 anos?**

“Não... menstruei com 14 anos” – P5

**Quais são as coisas que você faz no dia a dia que fazem parte do seu cuidado íntimo?**

“tomo banho de manhã... escovo dente (pausa) meio-dia e tomo também antes de dormir” – P5

**Já buscou ajuda profissional para ter mais informações sobre isso? Quais profissionais?**

“Não... eu tenho vergonha um pouco de falar disso com o médico..” – P5

**O que facilita ou dificulta a execução destes cuidados íntimos na sua opinião? Tipo o que pode ser difícil pra senhora fazer?**

“Limpar a unha do pé (risos)” – P5

**O que é inadequado na realização dos cuidados íntimos?**

“hum... não sei te responder” – P5

SEGUNDA ENTREVISTA - GRAVAÇÃO: **P5**

**Quais são as coisas que você faz no dia a dia que fazem parte do seu cuidado íntimo?**

“Eu acordo, aí tomo banho, escovo dente... meio dia de novo tomo banho e antes de dormir tomo outro banho” – P5

**O que facilita ou dificulta a execução destes cuidados íntimos na sua opinião?**

“O que que facilita é que eu gosto de tomar banho né... eu pago água limpa” – P5

**E o que dificulta?**

“Nada” – P5

**O que é inadequado na realização dos cuidados íntimos?**

(Pausa)

**(pergunta refeita) Depois que a senhora participou da brincadeira a senhora acha que fazia algo de inadequado?”**

“Não... dar pra fazer tudo certinho, o que pode ser errado é não tomar banho né” – P5
