# Supplementary material for: Understanding intimate self-care among riverine women: qualitative research through the lens of the Sunrise Model
Source: PubMed Central journal article supplement (PMC11259441; doi:10.1590/0034-7167-2023-0364), 2024-07-19
Supplement: 0034-7167-reben-77-02-e20230364-Suppl06.pdf [file 0034-7167-reben-77-02-e20230364-Suppl06.pdf]

## TRANSCRIÇÃO DE ENTREVISTA

ENTREVISTA – PÓS DINÂMICA. GRAVAÇÃO: **P6**

1. **Idade:** 20 anos
2. **Estado Civil:** solteira
3. **Filhos:** sim
- 3.1 **Se sim quantos:** 01
4. **Escolaridade:** Ensino Médio completo
5. **Profissão:** secretária do lar
6. **Qual sua renda mensal (quantos salários-mínimos):** menos de salário mínimo
7. **Quantas pessoas moram na sua casa:** 03 pessoas

### ENTREVISTA

**O que você compreende quando escuta a expressão “cuidados íntimos”?**

“não sei, acho que se lavar bem...” – P6

**Quem lhe ensinou a ter esse tipo de cuidado?**

“minha mãe” – P6

**A senhora lembra idade que começou pensar em cuidados íntimos?**

“desde cedo, acho que a partir 05 anos de idade ela já me ensinava me lavar, a como eu deveria colocar o absorvente” – P6

**Quais são as coisas que você faz no dia a dia que fazem parte do seu cuidado íntimo?**

“eu tomo banho cedo, eu me hidrato, passo óleo no corpo, hidratante, também escovo os meus dentes.” – P6

**Já buscou ajuda profissional para ter mais informações sobre isso? Quais profissionais?**

“não” – P6

**O que facilita ou dificulta a execução destes cuidados íntimos na sua opinião?**

“o que facilita é.., sei lá, aqui tem bastante água e a gente pode tomar banho toda a hora e o que dificulta lá em casa é porque eu não tenho banheiro dentro de casa...” – P6

**O que é inadequado na realização dos cuidados íntimos?**

“não sei, acho que não” – P6

ENTREVISTA – PÓS DINÂMICA. GRAVAÇÃO: **P6**

**Quais são as coisas que você faz no dia a dia que fazem parte do seu cuidado íntimo?**

“tomar banho, escovar dente, me lavar...” –P6

**O que facilita ou dificulta a execução destes cuidados íntimos na sua opinião?**

“ter bastante água facilita e não ter banheiro dificulta muito” – P6

**O que é inadequado na realização dos cuidados íntimos?**

“acho que a questão da água porque ela é muito barrenta” – P6
