# Supplementary material for: Understanding intimate self-care among riverine women: qualitative research through the lens of the Sunrise Model
Source: PubMed Central journal article supplement (PMC11259441; doi:10.1590/0034-7167-2023-0364), 2024-07-19
Supplement: 0034-7167-reben-77-02-e20230364-Suppl08.pdf [file 0034-7167-reben-77-02-e20230364-Suppl08.pdf]

## TRANSCRIÇÃO DE ENTREVISTA

ENTREVISTA – PÓS DINÂMICA. GRAVAÇÃO: **P8**

- 1. Idade:** 51 anos
- 2. Estado Civil:** casada
- 3. Filhos:** sim
- 3.1 Se sim quantos:** 02
- 4. Escolaridade:** fundamental incompleto
- 5. Profissão:** extrativista
- 6. Qual sua renda mensal (quantos salários-mínimos):** menos de salário mínimo
- 7. Quantas pessoas moram na sua casa:** 03 pessoas

### ENTREVISTA

**O que você compreende quando escuta a expressão “cuidados íntimos”?**

“tipo uma prevenção né, a gente tem que ter cuidados íntimos prevenir de doenças.” – P8

**Quem lhe ensinou a ter esse tipo de cuidado?**

“minha mãe” – P8

**A senhora lembra idade que começou pensar em cuidados íntimos?**

“meus cinco anos aí ela já ensinava a gente, já ajudava a gente a fazer esses cuidados” – P8

**Quais são as coisas que você faz no dia a dia que fazem parte do seu cuidado íntimo?**

“eu tomo banho cedo, faço aquele asseio, aí meio dia tomo outro banho, procuro tá sempre usando loção perfume desodorante, cuidar da minha alimentação também.” – P8

**Já buscou ajuda profissional para ter mais informações sobre isso? Quais profissionais?**

“não” – P8

**O que facilita ou dificulta a execução destes cuidados íntimos na sua opinião?**

“o que facilita é não ter coceira, lavar bem os meus cabelos e o que dificulta é não ter água limpa– P8

**O que é inadequado na realização dos cuidados íntimos?**

“não se lavar direito” – P8

ENTREVISTA – PÓS DINÂMICA. GRAVAÇÃO: **P8**

**Quais são as coisas que você faz no dia a dia que fazem parte do seu cuidado íntimo?**

“limpeza da região vaginal, eu aprendi que não devo usar sabonete íntimo todos os dias, agora posso usar o óleo de cocô nas relações sexuais, que não devo usar absorvente mais de quatro horas, o uso das ervas no meu asseio...” –P8

**O que facilita ou dificulta a execução destes cuidados íntimos na sua opinião?**

“o uso das ervas facilita os meus cuidados por que eu já tenho no mato e o que dificulta pra mim é a água” – P8

**O que é inadequado na realização dos cuidados íntimos?**

“A maneira de se enxugar, não colocar a toalha lá dentro da vagina” – P8
