# Supplementary material for: Understanding intimate self-care among riverine women: qualitative research through the lens of the Sunrise Model
Source: PubMed Central journal article supplement (PMC11259441; doi:10.1590/0034-7167-2023-0364), 2024-07-19
Supplement: 0034-7167-reben-77-02-e20230364-Suppl11.pdf [file 0034-7167-reben-77-02-e20230364-Suppl11.pdf]

## TRANSCRIÇÃO DE ENTREVISTA

PRIMEIRA ENTREVISTA - GRAVAÇÃO: P11

1. **Idade:** 48 anos
2. **Estado Civil:** solteira
3. **Filhos:** sim
- 3.1 **Se sim quantos:** 1
4. **Escolaridade:** nível superior
5. **Profissão:** professora
6. **Qual sua renda mensal (quantos salários-mínimos):** 1e 1/2 s. mínimo
7. **Quantas pessoas moram na sua casa:** 3

### ENTREVISTA

**O que você compreende quando escuta a expressão “cuidados íntimos”?**

“Cuidados íntimos é os cuidados com toda aquela região vagina e anus” – P11

**Quem lhe ensinou a ter esse tipo de cuidado? E com quantos anos?**

“Minha mãe... desde que me intendo de gente. Acho que uns 6 anos. Tanto que quando menstruei ela não ficou logo sabendo fui contar depois pra ela não brigar” – P11

**Quais são as coisas que você faz no dia a dia que fazem parte do seu cuidado íntimo?**

“Quando vou no banheiro fazer xixi e coco eu lavo e seco... e usar sabonete que seja próprio pra aquele cuidado” – P11

**Já buscou ajuda profissional para ter mais informações sobre isso? Quais profissionais?**

“Sim, quando ia na consulta ginecológica perguntava tudo, sempre fui muito curiosa e também perguntava para as amigas” – P11

**O que facilita ou dificulta a execução destes cuidados íntimos na sua opinião? Tipo o que pode ser difícil pra senhora fazer?**

“O que facilita é ter chuveirinho... dentro de casa tem, mas quando a gente sai nesses banheiros não tem e não pode nem se sentar. E o que dificulta é uma água de qualidade, o risco de pegar alguma coisa com a água do rio é maior” – P11

**O que é inadequado na realização dos cuidados íntimos?**

“Se limpar errado... muita gente não sabe a maneira certa, as vezes as mulheres não se lavam” – P11

## SEGUNDA ENTREVISTA - GRAVAÇÃO:

### **Quais são as coisas que você faz no dia a dia que fazem parte do seu cuidado íntimo?**

“Eu me lavo, principalmente depois das relações sexuais, faço meu asseio com chuveirinho depois de toda vez que faço minhas necessidades, além de usar produtos adequados pra minha limpeza” – P11

### **O que facilita ou dificulta a execução destes cuidados íntimos na sua opinião?**

“O que facilita é ter água encanada e ter condições financeiras para comprar produtos de boa qualidade” – P11

“O que dificulta falta de saneamento básico que prejudica toda comunidade, além da falta de acesso né... de ir e vir, e o acesso a esses produtos” – P11

### **O que é inadequado na realização dos cuidados íntimos?**

“Inadequado é a maneira de fazer a higiene, a reutilização de calcinhas sujas, o uso de absorvente por muito tempo, as vezes a mulher usa o absorvente até extravasar, o uso daquele absorvente interno que pode causar uma infecção, ah... e que vocês falaram sobre ter que fazer xixi depois da relação” – P11
