# Supplementary material for: Understanding intimate self-care among riverine women: qualitative research through the lens of the Sunrise Model
Source: PubMed Central journal article supplement (PMC11259441; doi:10.1590/0034-7167-2023-0364), 2024-07-19
Supplement: 0034-7167-reben-77-02-e20230364-Suppl12.pdf [file 0034-7167-reben-77-02-e20230364-Suppl12.pdf]

## TRANSCRIÇÃO DE ENTREVISTA

ENTREVISTA – PRÉ DINÂMICA. GRAVAÇÃO: **P12**

1. **Idade:** 24 anos
2. **Estado Civil:** solteira
3. **Filhos:** Sim
- 3.1 **Se sim quantos:** 01
4. **Escolaridade:** Cursando o ensino superior
5. **Profissão:** Autônoma
6. **Qual sua renda mensal (quantos salários-mínimos):** Menos de salário-mínimo
7. **Quantas pessoas moram na sua casa:** 04 pessoas

### ENTREVISTA

**O que você compreende quando escuta a expressão “cuidados íntimos”? A sua opinião sobre essa frase, quando a escuta.**

“Que é de extrema importância a gente se cuidar, fazer sempre é... a higiene. Ter sempre a higiene cuidadinha, sempre fazer os exames de rotinas, essas coisas assim” – P12

**Quem que lhe ensinou a ter esse tipo de cuidado?**

“A minha mãe” – P12

**A senhora lembra mais ou menos com quantos anos?**

“desde bem pequena, uns 05 anos... ensinou como a gente se lava.” – P12

**Quais são as coisas que você faz no seu dia a dia que fazem parte do seu cuidado íntimo?**

“o banho, o asseio nas calcinhas.” – P12

**Já buscou ajuda profissional para ter mais informações sobre isso? Quais profissionais?**

“não” – P12

**O que facilita ou dificulta a execução destes cuidados, para que você consiga realizá-los?**

“Não sei responder” – P12

**O que você acha que pode dificultar a execução desses cuidados íntimos para que sejam feitos de maneira adequada, na sua opinião?**

“Usar calcinha, por exemplo, ficar o dia inteiro sem trocar a calcinha, tipo... eu acho errado. O uso de sabonetes que não são apropriados pro nosso uso... eu acho que é só!”  
– P12

## ENTREVISTA – PÓS DINÂMICA. GRAVAÇÃO: **P12**

**Quais são as coisas que você faz no dia a dia que fazem parte dos seus cuidados íntimos?**

“O asseio nas peças íntimas, calcinhas essas coisas...” –P12

**O que facilita e o que dificulta a execução destes cuidados íntimos?**

“não sei responder” – P12

**O que é inadequado na realização dos cuidados íntimos?**

“O excesso de sabão íntimo, excesso de uso de protetor de calcinha” – P12

**O que a senhora achou da nossa atividade?**

“Sim, foi muito importante, assim a gente aprende. Achei muito bacana!” – P12
