# Supplementary material for: Understanding intimate self-care among riverine women: qualitative research through the lens of the Sunrise Model
Source: PubMed Central journal article supplement (PMC11259441; doi:10.1590/0034-7167-2023-0364), 2024-07-19
Supplement: 0034-7167-reben-77-02-e20230364-Suppl13.pdf [file 0034-7167-reben-77-02-e20230364-Suppl13.pdf]

## TRANSCRIÇÃO DE ENTREVISTA

### PRIMEIRA ENTREVISTA - GRAVAÇÃO: **P13**

1. **Idade:** 43 anos
2. **Estado Civil:** solteira
3. **Filhos:** sim
- 3.1 **Se sim quantos:** 2
4. **Escolaridade:** ens. Médico completo
5. **Profissão:** pescadora
6. **Qual sua renda mensal (quantos salários-mínimos):** 1/2 s. mínimo
7. **Quantas pessoas moram na sua casa:** 4

### ENTREVISTA

#### **O que você compreende quando escuta a expressão “cuidados íntimos”?**

“O que acho que é cuidado íntimo é.... higienizar bem as partes, manter sempre os pelos aparadinhos” – P13

#### **Quem lhe ensinou a ter esse tipo de cuidado?**

“Minha mãe...” – P13

#### **E com quantos anos a senhora lembra?**

“Uns 7 anos” – P13

#### **Quais são as coisas que você faz no dia a dia que fazem parte do seu cuidado íntimo?**

“Olha a hora que tomo banho... meio que só isso né” – P13

#### **Já buscou ajuda profissional para ter mais informações sobre isso? Quais profissionais?**

“não” – P13

#### **O que facilita ou dificulta a execução destes cuidados íntimos na sua opinião?**

“O que dificulta é o acesso né a médico... hospital” – P13

#### **O que é inadequado na realização dos cuidados íntimos?**

“Não tem nada que acho inadequado” – P13

SEGUNDA ENTREVISTA - GRAVAÇÃO: P13

**Quais são as coisas que você faz no dia a dia que fazem parte do seu cuidado íntimo?**

“Toma banho... acho que só isso” – P13

**O que facilita ou dificulta a execução destes cuidados íntimos na sua opinião?**

“Facilita... não sei responder” – P13

**E o que dificulta?**

“O acesso que a gente não tem de informação e pra ir no médico” – P13

**O que é inadequado na realização dos cuidados íntimos?**

“Ah não sei...” – P13
