# Supplementary material for: Understanding intimate self-care among riverine women: qualitative research through the lens of the Sunrise Model
Source: PubMed Central journal article supplement (PMC11259441; doi:10.1590/0034-7167-2023-0364), 2024-07-19
Supplement: 0034-7167-reben-77-02-e20230364-Suppl14.pdf [file 0034-7167-reben-77-02-e20230364-Suppl14.pdf]

## TRANSCRIÇÃO DE ENTREVISTA

ENTREVISTA – PRÉ DINÂMICA. GRAVAÇÃO: **P14**

1. **Idade:** 32 anos
2. **Estado Civil:** Solteira
3. **Filhos:** Sim
- 3.1 **Se sim quantos:** 03
4. **Escolaridade:** E. médio incompleto
5. **Profissão:** Extrativista
6. **Qual sua renda mensal (quantos salários-mínimos):** Menos de salário-mínimo
7. **Quantas pessoas moram na sua casa:** 05 pessoas

### ENTREVISTA

**O que você compreende quando escuta a expressão “cuidados íntimos”?**

“Compreendo como sendo uma coisa boa pra mim, o cuidado que faço comigo” – P14

**Quem que lhe ensinou a ter esses cuidados?**

“A minha mãe” – P14

**A senhora lembra mais ou menos com quantos anos?**

“eu tinha 11 anos, mais ou menos – P14

**Quais são as coisas que você faz no seu dia a dia que fazem parte do seu cuidado íntimo?**

“tomar um banho, lavar minhas partes íntimas, usar sabonete íntimo.” – P14

**Já buscou ajuda profissional para ter mais informações sobre isso? Quais eram esses profissionais?**

“sim, o ginecologista” – P14

**O que facilita ou dificulta a execução destes cuidados, para que você consiga realizá-los?**

“facilita a gente vir aqui se tratar, ter a unidade perto, ter lugares pertos para comprar produtos. Não sei o que dificulta” – P14

**O que você acha que pode dificultar a execução desses cuidados íntimos para que sejam feitos de maneira adequada, na sua opinião?**

“Não sei te explicar” – P14

## ENTREVISTA – PÓS DINÂMICA. GRAVAÇÃO: **P14**

**Quais são as coisas que você faz no dia a dia que fazem parte dos seus cuidados íntimos?**

“Quando vou no banheiro eu me lavo, tomo banho, vários no dia, passo hidratante, é isso–  
P14

**O que facilita e o que dificulta a execução destes cuidados íntimos, na sua opinião?**

“O que facilita é a gente ter acesso né ao posto de saúde, ter lugares próximos pra comprar material pra cuidar da gente. O que dificulta é a gente não ter algumas coisas, uma água encanada, é muito complicado, a água tem muita bactéria” – P14

**O que é inadequado na realização dos cuidados íntimos?**

“A água ser suja do rio, que faz não conseguir se limpar direito” – P14
