# Supplementary material for: Understanding intimate self-care among riverine women: qualitative research through the lens of the Sunrise Model
Source: PubMed Central journal article supplement (PMC11259441; doi:10.1590/0034-7167-2023-0364), 2024-07-19
Supplement: 0034-7167-reben-77-02-e20230364-Suppl15.pdf [file 0034-7167-reben-77-02-e20230364-Suppl15.pdf]

## TRANSCRIÇÃO DE ENTREVISTA

PRIMEIRA ENTREVISTA - GRAVAÇÃO: P15

1. **Idade:** 52 anos
2. **Estado Civil:** solteira
3. **Filhos:** sim
- 3.1 **Se sim quantos:** 3
4. **Escolaridade:** ens. Fundamental inc.
5. **Profissão:** açai e pesca
6. **Qual sua renda mensal (quantos salários-mínimos):** 1/2 s. mínimo
7. **Quantas pessoas moram na sua casa:** 6

### ENTREVISTA

**O que você compreende quando escuta a expressão “cuidados íntimos”?**

“Cuidados íntimos... é cuidar de mim né, eu banho” – P15

**Quem lhe ensinou a ter esse tipo de cuidado? E com quantos anos?**

“Olha foi minha irmã.. quando era pequena... uns 6 anos” – P15

**Quais são as coisas que você faz no dia a dia que fazem parte do seu cuidado íntimo?**

“Eu tomo banho” – P15

**Já buscou ajuda profissional para ter mais informações sobre isso? Quais profissionais?**

“Não não” – P15

**O que facilita ou dificulta a execução destes cuidados íntimos na sua opinião? Tipo o que pode ser difícil pra senhora fazer?**

“O dia a dia não deixa né cuidar de mim, tem que trabalhar cuidar da casa das crianças e num tenho muito tempo sabe” – P15

**O que é inadequado na realização dos cuidados íntimos?**

“Hum.. não sei não” – P15

SEGUNDA ENTREVISTA - GRAVAÇÃO:

**Quais são as coisas que você faz no dia a dia que fazem parte do seu cuidado íntimo?**

“Cuidar das calcinhas... cuidar do corpo” – P15

**Teve alguma coisa que a ente falou e a senhora não sabia?**

“Teve... aquela pergunta do óleo de coco... não sabia que podia usar” – P15

**O que facilita ou dificulta a execução destes cuidados íntimos na sua opinião?**

“O que dificulta é falta de informação né... facilita... hum não sei” – P15

**“Depois que a senhora participou da brincadeira a senhora acha que fazia algo de inadequado”**

“Lavar a calcinha e colocar no banheiro... eu não sabia, agora aprendi e vou colocar no sol” – P15
