# Supplementary material for: Understanding intimate self-care among riverine women: qualitative research through the lens of the Sunrise Model
Source: PubMed Central journal article supplement (PMC11259441; doi:10.1590/0034-7167-2023-0364), 2024-07-19
Supplement: 0034-7167-reben-77-02-e20230364-Suppl16.pdf [file 0034-7167-reben-77-02-e20230364-Suppl16.pdf]

## TRANSCRIÇÃO DE ENTREVISTA

ENTREVISTA – PRÉ DINÂMICA. GRAVAÇÃO: **P16**

- 1. Idade:** 18 anos
- 2. Estado Civil:** Solteira
- 3. Filhos:** Não
- 3.1 Se sim quantos:** 0
- 4. Escolaridade:** E. médio incompleto
- 5. Profissão:** Desempregada
- 6. Qual sua renda mensal (quantos salários-mínimos):** Menos de um salário-mínimo
- 7. Quantas pessoas moram na sua casa:** 02 pessoas

### ENTREVISTA

**O que você compreende quando escuta a expressão “cuidados íntimos”?**

“ah, que a mulher tem que se cuidar mais. Não sei muito bem” – P16

**Quem que lhe ensinou a ter esses cuidados?**

“A minha mãe” – P16

**A senhora lembra mais ou menos com quantos anos?**

“depois que eu comecei a menstruar, com 12 anos – P16

**Quais são as coisas que você faz no seu dia a dia que fazem parte do seu cuidado íntimo?**

“tomar banho, passar sabão... acho que é isso.” – P16

**Já buscou ajuda profissional para ter mais informações sobre isso? Quais eram esses profissionais?**

“não” – P16

**O que facilita ou dificulta a execução destes cuidados, para que você consiga realizá-los?**

“não sei responder” – P16

**O que você acha que está sendo realizado de maneira inadequada nesses cuidados?**

“Tomar pouco banho, não se lavar direito... acho que só!” – P16

ENTREVISTA – PÓS DINÂMICA. GRAVAÇÃO: **P16**

**Quais são as coisas que você faz no dia a dia que fazem parte dos seus cuidados íntimos?**

“Tomar banho, fazer o asseio correto, lavar as calcinhas, trocar o absorvente... essas coisas” –P16

**O que facilita e o que dificulta a execução destes cuidados íntimos, na sua opinião?**

“Eu acho que o que facilita é ter bastante água, a gente toma vários banhos no dia, dá pra fazer o asseio. Os produtos também. O que dificulta é a água tem barro, não é limpa, e nem sempre conseguir comprar o material certo pra usar” – P16

**O que é inadequado na realização dos cuidados íntimos?**

“é o que foi dito né, que é usar muito tempo o absorvente, que é deixar a alcinha no banheiro, usar papel higiênico errado, o sabão íntimo, essas coisas (risos)” – P16
