# Supplementary material for: Understanding intimate self-care among riverine women: qualitative research through the lens of the Sunrise Model
Source: PubMed Central journal article supplement (PMC11259441; doi:10.1590/0034-7167-2023-0364), 2024-07-19
Supplement: 0034-7167-reben-77-02-e20230364-Suppl17.pdf [file 0034-7167-reben-77-02-e20230364-Suppl17.pdf]

## TRANSCRIÇÃO DE ENTREVISTA

PRIMEIRA ENTREVISTA - GRAVAÇÃO: P17

1. **Idade:** 43 anos
2. **Estado Civil:** união estável
3. **Filhos:** sim
- 3.1 **Se sim quantos:** 2
4. **Escolaridade:** ens. Médio completo
5. **Profissão:** garçonne
6. **Qual sua renda mensal (quantos salários-mínimos):** 1 e 1/2 s. mínimo
7. **Quantas pessoas moram na sua casa:** 3

### ENTREVISTA

**O que você compreende quando escuta a expressão “cuidados íntimos”?**

“Cuidados é tipo o asseio né... aquele bem feito” - P17

**Bem feito como?**

“Ah tipo com sabonete e água limpa” - P17

**Quem lhe ensinou a ter esse tipo de cuidado? E com quantos anos?**

“Olha foi minha mãe... bem pequena com uns cinco anos, igual eu falo pra minha filha”  
- P17

**Quais são as coisas que você faz no dia a dia que fazem parte do seu cuidado íntimo?**

“Eu lavo bem, uso sabonete íntimos todo dia” - P17

**Já buscou ajuda profissional para ter mais informações sobre isso? Quais profissionais?**

“Não” - P17

**O que facilita ou dificulta a execução destes cuidados íntimos na sua opinião? Tipo o que pode ser difícil pra senhora fazer?**

“Eu trabalho dia todo né... não tenho tempo muito pra mim” - P17

**O que é inadequado na realização dos cuidados íntimos?**

“Errado é não tomar banho, não lavar direito, usar muito tempo a mesma calcinha” - P17

SEGUNDA ENTREVISTA - GRAVAÇÃO:

**Quais são as coisas que você faz no dia a dia que fazem parte do seu cuidado íntimo?**

“Higiene né... com o sabão (pausa)... Pois é eu tava na duvida do sabonete, eu usava né mais tinha aquele receio, agora que vocês disseram lá agora já sei” - P17

**O que facilita ou dificulta a execução destes cuidados íntimos na sua opinião?**

“É o tempo né que dificulta... o dia todo fora de casa, só dar de manhã e a noite” - P17

**O que é inadequado na realização dos cuidados íntimos?**

“Agora sei que é ficar dia todo com absorvente pra mim era normal o máximo de tempo” - P17
