# Supplementary material for: Understanding intimate self-care among riverine women: qualitative research through the lens of the Sunrise Model
Source: PubMed Central journal article supplement (PMC11259441; doi:10.1590/0034-7167-2023-0364), 2024-07-19
Supplement: 0034-7167-reben-77-02-e20230364-Suppl19.pdf [file 0034-7167-reben-77-02-e20230364-Suppl19.pdf]

## TRANSCRIÇÃO DE ENTREVISTA

PRIMEIRA ENTREVISTA - GRAVAÇÃO: P19

1. **Idade:** 27 anos
2. **Estado Civil:** solteira
3. **Filhos:** sim
- 3.1 **Se sim quantos:** 2
4. **Escolaridade:** ens. Médio completo
5. **Profissão:** rural
6. **Qual sua renda mensal (quantos salários-mínimos):** 1 s. mínimo
7. **Quantas pessoas moram na sua casa:** 2

### ENTREVISTA

**O que você compreende quando escuta a expressão “cuidados íntimos”?**

“Acho que cuidar do meu corpo, e da higiene” – P19

**Quem lhe ensinou a ter esse tipo de cuidado? E com quantos anos?**

“Minha mãe... desde os 5 anos” – P19

**Quais são as coisas que você faz no dia a dia que fazem parte do seu cuidado íntimo?**

“Eu tomo banho e sabe... é tomo banho antes do trabalho e depois do trabalho” – P19

**Já buscou ajuda profissional para ter mais informações sobre isso? Quais profissionais?**

“Sim.. o ginecologista né” – P19

**O que facilita ou dificulta a execução destes cuidados íntimos na sua opinião? Tipo o que pode ser difícil pra senhora fazer?**

“O que facilita é quando a gente ta em casa né... tem mais tempo, mas quando ta na rua é mais difícil, e antes também quando não tinha água encanada era difícil tinha que tomar no rio ou ir pegar água no poço” – P19

**O que é inadequado na realização dos cuidados íntimos?**

“Acho que não usar o sabonete íntimo né... usar sabão de pedra” – P19

## SEGUNDA ENTREVISTA - GRAVAÇÃO:

### **Quais são as coisas que você faz no dia a dia que fazem parte do seu cuidado íntimo?**

“Assim como vocês disseram lá, faço a higiene correta quando vou banheiro, sabe lá da forma certa de limpar e na hora do banho” – P19

### **O que facilita ou dificulta a execução destes cuidados íntimos na sua opinião?**

“O que dificulta é o meu tempo mesmo... mas a gente ter água encanada facilita o banho e sabe pra não usar água suja nas partes” – P19

### **O que é inadequado na realização dos cuidados íntimos?**

“Hum aquilo lá do sabonete íntimo que vocês explicaram de não poder usar todo dia, eu usava todo dia, e do absorvente de ter que trocar né... as vezes por causa do tempo a gente fica dia todo com um e a calça jeans que pode dar fungo... sabe muito importante saber essas coisas pra gente não ficar fazendo” – P19
